# Supplementary material for: Association of Schizophrenia in 22q11.2 Deletion Syndrome and Gray Matter Volumetric Deficits in the Superior Temporal Gyrus
Source: Atypon-hosted journal article supplement (doi:10.1176/appi.ajp.2010.10081230), 2011-03-02
Supplement: ajp_168_05_522_01.pdf [file ajp_168_05_522_01.pdf]

## Correction

At the time the article "Association of Schizophrenia in 22q11.2 Deletion Syndrome and Gray Matter Volumetric Deficits in the Superior Temporal Gyrus," by Eva W.C. Chow et al., was published online on March 1, 2011, the first paragraph in the Results section misreported the mean age at time of scan for one of the study groups. The final sentence of the paragraph should have read as follows:

"The mean age at time of scan in the nonpsychotic group was 27.8 years (SD=10.1)."

This change was made for the article's online posting on April 7, 2011, and for the article's print appearance in the May 2011 issue and for its online posting as part of that issue.
